# Supplementary material for: Germline/soma distinction in Drosophila embryos requires regulators of zygotic genome activation
Source: eLife. 2023 Jan 4;12:e78188. doi: 10.7554/eLife.78188 (PMC9812407; doi:10.7554/eLife.78188)
Supplement: Supplementary file 1. [file elife-78188-supp1.xlsx]

## Sheet: Sheet1
dpp transcript FISH probes
PROBE #	PROBE (5'-> 3')
1	ttgaaaagtcgccagcactg
2	ggtgctagcaactcgaacaa
3	gcgatgaatctctgggatat
4	atgcttttgctaatgctgtg
5	actatcactgaacgaggcgg
6	ttttactccgatggctttta
7	gtcacttttgctaggttttt
8	atgcacttcgttgaactgtc
9	ctaattggtctgttcttggc
10	attttgttgtggttgggttt
11	gagattctgtggatgcactg
12	tcctccacgaagattgattc
13	tcttctcgatctcgactaga
14	catgttgaacagcgagagca
15	cggggatgatgatcttggag
16	tgcggaaatcgatcgtcgat
17	aatgctcttcacgtcgaagt
18	cgtgatgtcgtagacaagca
19	cagtaatatgcatcgtagcc
20	tggtcgagttaaagtggtcg
21	cgggattcatattgttgacc
22	ttggtcgttgagatagagca
23	gaatctatcgacagccacag
24	attcactcggttgagtggat
25	aacagcatttgatgctctct
26	aagcattgacggcttggaac
27	attcagtccattttgtttgc
28	tgtttgctcgttactcgata
29	gaaatcgacagaggctccaa
30	ctctcaaatctgcactctga
31	cggctatatacagtggactc
32	atctgaagtatctggcggat
33	ctaagcatactcctcttttc
34	tgttcaattggtcgctctta
35	ataccagttcgcatcgatag
36	cggctagtagaataggtctc
37	agtggtttgctattgcttta
38	gttatgctctcgctagttaa
39	ctgtttgtttttctggtctt
40	agtttgaataccctttcgtc
41	agggcattcgttttgtttat
42	gagcttagcttagaacgcat
43	tatccaacatgctgagctta
44	ggttttttctcttttctctc
45	ccatttatcgggttttcttt
46	tgcaacatcaggcacgaatc
47	actgcatatacgagacgtgc
48	ttcatctttcttttcatcct
