# Supplementary material for: Germline/soma distinction in Drosophila embryos requires regulators of zygotic genome activation
Source: eLife. 2023 Jan 4;12:e78188. doi: 10.7554/eLife.78188 (PMC9812407; doi:10.7554/eLife.78188)
Supplement: Table 1—source data 1. [file elife-78188-table1-data1.xlsx]

## Sheet: Sheet1
Genotype	PGC Count
egfpim	25
egfpim	21
egfpim	20
egfpim	20
egfpim	19
egfpim	25
egfpim	12
egfpim	15
egfpim	18
egfpim	17
egfpim	19
egfpim	20
zldi1m	1
zldi1m	14
zldi1m	3
zldi1m	10
zldi1m	20
zldi1m	20
zldi1m	20
zldi1m	13
zldi1m	18
zldi1m	21
zldi1m	15
zldi1m	10
zldi1m	15
zldi1m	16
zldi1m	9
egfpiz	22
egfpiz	20
egfpiz	19
egfpiz	18
egfpiz	22
egfpiz	18
egfpiz	22
egfpiz	18
egfpiz	17
egfpiz	21
zldi2z	11
zldi2z	15
zldi2z	11
zldi2z	21
zldi2z	15
zldi2z	11
zldi2z	9
zldi2z	10
clampiz	10
clampiz	10
clampiz	20
clampiz	8
clampiz	19
clampiz	18
clampiz	10
clampiz	6
