# Supplementary material for: Germline/soma distinction in Drosophila embryos requires regulators of zygotic genome activation
Source: eLife. 2023 Jan 4;12:e78188. doi: 10.7554/eLife.78188 (PMC9812407; doi:10.7554/eLife.78188)
Supplement: Table 2—source data 1. [file elife-78188-table2-data1.xlsx]

## Sheet: Sheet1
Replicate	Genotype	Stage	Pole Plasm Spreading Defect Class		Stages:	NCs
1	egfpi	ESB	None		PB	6-9	pre-blastoderm
1	egfpi	PB	None		ESB	10/11	early syncytial blastoderm
1	egfpi	ESB	None		LSB	12/13	late syncytial blastoderm
1	egfpi	PB	None		CB	14	cellular blastoderm
1	egfpi	PB	None
1	egfpi	PB	None
1	zldi1m	PB	None
1	zldi1m	ESB	None
1	zldi1m	ESB	None
1	zldi1m	ESB	Moderate
1	zldi1m	PB	None
1	zldi1m	ESB	Moderate
2	egfpi	ESB	None
2	egfpi	LSB	None
2	egfpi	LSB	None
2	egfpi	LSB	None
2	egfpi	LSB	None
2	zldi1m	ESB	None
2	zldi1m	ESB	None
2	zldi1m	LSB	Moderate
2	zldi1m	LSB	Moderate
2	zldi1m	LSB	None
2	zldi1m	LSB	Severe
3	egfpi	ESB	None
3	egfpi	LSB	None
3	egfpi	LSB	None
3	egfpi	ESB	None
3	egfpi	LSB	None
3	egfpi	LSB	None
3	zldi1m	LSB	None
3	zldi1m	LSB	Moderate
3	zldi1m	LSB	Moderate
3	zldi1m	LSB	Moderate
3	zldi1m	ESB	Moderate
3	zldi1m	ESB	None
4	egfpi	ESB	None
4	egfpi	LSB	None
4	egfpi	LSB	None
4	egfpi	LSB	None
4	egfpi	ESB	None
4	egfpi	LSB	None
4	egfpi	LSB	None
4	egfpi	LSB	Moderate
4	egfpi	LSB	None
4	egfpi	LSB	None
4	zldi1m	ESB	None
4	zldi1m	LSB	Moderate
4	zldi1m	LSB	Moderate
4	zldi1m	ESB	Moderate
4	zldi1m	ESB	Moderate
4	zldi1m	ESB	None
4	zldi1m	LSB	None
4	zldi1m	LSB	Moderate
4	zldi1m	LSB	Moderate
4	zldi1m	LSB	None
5	egfpi	LSB	None
5	egfpi	LSB	None
5	egfpi	ESB	None
5	egfpi	ESB	None
5	egfpi	LSB	Moderate
5	egfpi	ESB	None
5	egfpi	LSB	None
5	egfpi	LSB	None
5	egfpi	LSB	None
5	egfpi	ESB	None
5	zldi1m	LSB	Moderate
5	zldi1m	LSB	None
5	zldi1m	LSB	Moderate
5	zldi1m	LSB	Moderate
5	zldi1m	LSB	Severe
5	zldi1m	ESB	Moderate
5	zldi1m	LSB	Moderate
5	zldi1m	LSB	None
5	zldi1m	LSB	Moderate
5	zldi1m	ESB	Severe
5	zldi1m	LSB	Severe
5	zldi1m	LSB	Moderate
6	egfpi	LSB	None
6	egfpi	LSB	None
6	egfpi	LSB	None
6	egfpi	LSB	None
6	egfpi	ESB	None
6	egfpi	LSB	None
6	egfpi	LSB	Moderate
6	zldi1m	ESB	Moderate
6	zldi1m	ESB	Moderate
6	zldi1m	LSB	Moderate
6	zldi1m	LSB	Moderate
6	zldi1m	LSB	Moderate
6	zldi1m	ESB	Severe
7	egfpi	ESB	Moderate
7	egfpi	ESB	None
7	egfpi	PB	None
7	egfpi	PB	None
7	egfpi	PB	None
7	egfpi	PB	None
7	egfpi	ESB	None
7	egfpi	PB	None
7	egfpi	PB	None
7	egfpi	PB	None
7	zldi1m	PB	None
7	zldi1m	ESB	Moderate
7	zldi1m	PB	None
7	zldi1m	PB	None
7	zldi1m	ESB	Moderate
7	zldi1m	PB	None
7	zldi1m	PB	None
7	zldi1m	PB	None
7	zldi1m	PB	None
7	zldi1m	PB	None
7	zldi1m	PB	None
7	zldi1m	PB	None
8	egfpi	ESB	Moderate
8	egfpi	LSB	None
8	egfpi	ESB	Moderate
8	egfpi	ESB	None
8	egfpi	ESB	None
8	egfpi	ESB	None
8	egfpi	ESB	None
8	egfpi	LSB	Moderate
8	egfpi	LSB	None
8	egfpi	ESB	None
8	zldi1m	ESB	Moderate
8	zldi1m	LSB	Moderate
8	zldi1m	ESB	Moderate
8	zldi1m	ESB	Severe
8	zldi1m	LSB	None
8	zldi1m	LSB	Moderate
8	zldi1m	ESB	None
8	zldi1m	ESB	Moderate
8	zldi1m	LSB	Moderate
8	zldi1m	LSB	Severe
9	egfpi	ESB	None
9	egfpi	ESB	None
9	egfpi	LSB	None
9	egfpi	LSB	Moderate
9	egfpi	ESB	Moderate
9	egfpi	LSB	None
9	egfpi	ESB	None
9	egfpi	LSB	None
9	egfpi	ESB	None
9	zldi1m	LSB	None
9	zldi1m	LSB	Moderate
9	zldi1m	ESB	None
9	zldi1m	LSB	Moderate
9	zldi1m	ESB	Severe
9	zldi1m	LSB	Moderate
9	zldi1m	ESB	Moderate
9	zldi1m	ESB	None
9	zldi1m	LSB	None
9	zldi1m	ESB	Severe
9	zldi1m	LSB	None
9	zldi1m	LSB	Moderate
10	egfpi	PB	None
10	egfpi	PB	None
10	egfpi	PB	None
10	egfpi	PB	None
10	egfpi	PB	None
10	egfpi	PB	None
10	egfpi	PB	None
10	egfpi	PB	None
10	egfpi	PB	None
10	egfpi	PB	None
10	zldi1m	PB	None
10	zldi1m	PB	None
10	zldi1m	PB	None
10	zldi1m	PB	None
10	zldi1m	PB	None
10	zldi1m	PB	None
10	zldi1m	PB	None
10	zldi1m	PB	None
10	zldi1m	PB	None
10	zldi1m	PB	None
10	zldi1m	PB	Moderate
10	zldi1m	PB	None
11	egfpi	LSB	Moderate
11	egfpi	LSB	None
11	egfpi	LSB	None
11	egfpi	LSB	None
11	egfpi	LSB	None
11	egfpi	ESB	None
11	egfpi	LSB	None
11	egfpi	LSB	None
11	egfpi	LSB	None
11	egfpi	LSB	Moderate
11	zldi1m	LSB	None
11	zldi1m	LSB	Moderate
11	zldi1m	LSB	Moderate
11	zldi1m	LSB	Moderate
11	zldi1m	LSB	Moderate
11	zldi1m	LSB	Severe
11	zldi1m	ESB	None
11	zldi1m	LSB	Severe
11	zldi1m	LSB	Severe
11	zldi1m	LSB	Moderate
12	egfpi	LSB	None
12	egfpi	LSB	None
12	egfpi	LSB	None
12	egfpi	LSB	Moderate
12	egfpi	LSB	None
12	egfpi	LSB	None
12	zldi1m	ESB	Severe
12	zldi1m	LSB	Moderate
12	zldi1m	LSB	Moderate
12	zldi1m	LSB	Moderate
12	zldi1m	ESB	Moderate
12	zldi1m	LSB	Moderate
12	zldi1m	LSB	None
12	zldi1m	LSB	None
